# Supplementary material for: Genome-wide identification and analysis of YTH gene family and its response to MeJA and salt treatment in Panax ginseng C. A. Meyer
Source: Research Square preprint supplement (doi:10.21203/rs.3.rs-7523802/v1), 2025-09-30
Supplement: Supplementary file 1 [file c2568ec086831a6f69f94568.xlsx]

## Sheet: Cis-acting elements
Table S3. Cis-acting elements of PgYTHs
Group	Cis-elements	Numbers
Light responsive	Light responsive	224
Hormone response	MeJA responsive	48
	Abscisic acid responsive	39
	Gibberellin responsive	17
	Salicylic acid responsive	13
	Auxin responsive	14
Environmental stress-related	Low-temperature responsive	8
	MYB binding site involved in drought-inducibility	27
	Mixed stress	5
	Wound-responsive element	6
	Anaerobic induction	35
	Anoxic specific inducibility	4
Developmental response	Zein metabolism regulation	11
	Endosperm expression	4
	Meristem expression	8
	Palisade mesophyll cells	4
Other elements	Circadian control	2
