# Supplementary material for: Genome-wide identification and analysis of YTH gene family and its response to MeJA and salt treatment in Panax ginseng C. A. Meyer
Source: Research Square preprint supplement (doi:10.21203/rs.3.rs-7523802/v1), 2025-09-30
Supplement: Supplementary file 2 [file c75fad356bee0c6c5cd8c8d3.xlsx]

## Sheet: Sheet1
Table S2. Primers used for qRT-PCR.
Primer name	Primer Sequence (5'-3')
Pg-β-actin-F	GCTGGATTCTGGTGATGGTGT
Pg-β-actin-R	ACCGAAGGGCTAGTCTTTGA
Pg-YTH1-F	ACAGTTACGGCAATTCAAACAGA
Pg-YTH1-R	CTGACACCATTAGCACCTTGT
Pg-YTH2-F	AACCGTATTTTCGCTTGGGC
Pg-YTH2-R	ACACACAGAGGAGAGCAGAG
Pg-YTH3-F	TGATAACTTGACAGAGCAGCC
Pg-YTH3-R	GTGGGTAGACGGTGGCAA
Pg-YTH4-F	TGCAGGCCTGAAGTCTGATA
Pg-YTH4-R	GGTAGACGTAGCATCCCCTG
Pg-YTH5-F	AATCGAGCAATCTGAGGCAG
Pg-YTH5-R	TCGACTAGCCTCACCTTTGA
Pg-YTH6-F	ATTGGATGCTGCGTATCGTG
Pg-YTH6-R	TCAGCTACACCGCAGAATTG
Pg-YTH7-F	TTCTCTGCTCTCCTGTGTGT
Pg-YTH7-R	AGTGATAAGCATCCCCGTCC
Pg-YTH8-F	TGACAGAACAGCCATTTCCG
Pg-YTH8-R	CCCCACAGTAGAAGGCTTGT
Pg-YTH9-F	GGTGGCGGCTTAAAGGGAAA
Pg-YTH9-R	AAATTCCTCCAGGCAAGGCA
Pg-YTH10-F	GGGAAGGAAAGCCTACTACCG
Pg-YTH10-R	TCCACCGCCATTTGTCTGAAT
Pg-YTH11-F	GGAAGGCTCCTCCCAGAAGT
Pg-YTH11-R	GTAATCGGTCCGTCTCCAACT
Pg-YTH12-F	CCCAGAAGTCGGTAGATGCT
Pg-YTH12-R	CAACTGTTACCTTCTCTGGTAGC
Pg-YTH13-F	ACCTGTTGCTGCTGAGAGAC
Pg-YTH13-R	GGTTGCATCTGGAGAACTCG
Pg-YTH14-F	ACTAACTTATGCAGGGGATGGT
Pg-YTH14-R	ACCCTTTAAAGTCCCAGTAGCA
Pg-YTH15-F	AAGTGGGCAATTTGTAGGCG
Pg-YTH15-R	TTGCCCAAGTCCAATCTCCT
Pg-YTH16-F	GAGGAGGAAGAAGAAGAAAGTGA
Pg-YTH16-R	CTAATGGCATGTGAGGAGGC
Pg-YTH17-F	CTGGACCTAGCAAGCAGTCT
Pg-YTH17-R	GCTTGAGTACCTCTGCCC
Pg-YTH18-F	TGAAATGATTGGCGCAGTAGA
Pg-YTH18-R	TGTGCCTGAAGTTTGGGTTT
