# Supplementary material for: Genome-wide identification and analysis of YTH gene family and its response to MeJA and salt treatment in Panax ginseng C. A. Meyer
Source: Research Square preprint supplement (doi:10.21203/rs.3.rs-7523802/v1), 2025-09-30
Supplement: Supplementary file 3 [file d6332fcb19cbb88fb16aae75.xlsx]

## Sheet: Ka、Ks
Table S4. The Ka/Ks ratios and estimated divergence times for duplicate pairs of PgYTHs.
Duplication gene pair		Ka	Ks	Ka/Ks	Divergence time (MYA)
PgYTH1	PgYTH16	0.0063772021028583835	0.026364753313422185	0.24188362496878651	2.02806
PgYTH2	PgYTH7	0.027609192457461955	0.03855953860658673	0.7160145960031212	2.96612
PgYTH3	PgYTH13	0.08198109217565373	0.29893027130012606	0.2742482111935218	22.9946
PgYTH3	PgYTH8	0.005078002713915334	0.014534164964347387	0.34938386390768106	1.11801
PgYTH3	PgYTH6	0.07927453561461624	0.31868600079301823	0.24875437081437368	24.5143
PgYTH4	PgYTH5	0.1497442194274758	0.3815791762156116	0.3924328914187464	29.3522
PgYTH4	PgYTH14	0.14877010125673307	0.40087842986837546	0.3711102672837256	30.8368
PgYTH4	PgYTH15	0.014448038861455405	0.031195422974127845	0.4631461119612962	2.39965
PgYTH5	PgYTH14	0.018252454839640803	0.026752724795589357	0.6822652637853932	2.0579
PgYTH5	PgYTH15	0.14361419699106895	0.3769716424213595	0.3809681706258011	28.9978
PgYTH6	PgYTH8	0.07792799056171062	0.2994464900000914	0.2602401202354612	23.0343
PgYTH6	PgYTH13	0.007865173671164998	0.024132385502088828	0.3259177867220881	1.85634
PgYTH8	PgYTH13	0.08023710033336626	0.28884608576811255	0.27778496675832093	22.2189
PgYTH9	PgYTH11	0.05436513364049178	0.2635484151284182	0.20628139089359157	20.273
PgYTH9	PgYTH12	0.010651251953973088	0.037462269399126086	0.2843194532742739	2.88171
PgYTH10	PgYTH11	0.01190128323847468	0.025011001184989827	0.47584193653219886	1.92392
PgYTH10	PgYTH12	0.0574769942819645	0.2751115343478827	0.20892251725543418	21.1624
PgYTH14	PgYTH15	0.142657580080259	0.39591859864891066	0.3603204814501874	30.4553
PgYTH17	PgYTH18	0.010381316833293465	0.03486019575036845	0.2977985811563821	2.68155
